# Supplementary material for: Predictors of all-cause and cardiovascular disease mortality in type 2 diabetes: Diabetes Heart Study
Source: PubMed Central journal article supplement (PMC4490739; doi:10.1186/s13098-015-0055-y), 2015-06-28
Supplement: 13098_2015_55_MOESM2_ESM.pdf [file 13098_2015_55_MOESM2_ESM.pdf]

Additional file 2. Model selected for all-cause mortality using backward elimination, forward selection, and stepwise selection in two randomly selected datasets from European American participants with type 2 diabetes. Age and sex were forced into all models. Hazards ratios (HRs) are for a one standard deviation change in the predictor (continuous variables) or change in group assignment (dichotomous variables). For medication use HRs, the HRs are for risk of mortality among those individuals using the given medication class.

| Random dataset 1                      |              |                                      |      |                        | Random dataset 2                        |              |                                      |      |                       |
|---------------------------------------|--------------|--------------------------------------|------|------------------------|-----------------------------------------|--------------|--------------------------------------|------|-----------------------|
| Trait                                 | Hazard Ratio | 95% Hazard Ratio Confidence Interval |      | p-value                | Trait                                   | Hazard Ratio | 95% Hazard Ratio Confidence Interval |      | p-value               |
| <b>Age</b>                            | 1.96         | 1.60                                 | 2.40 | $7.50 \times 10^{-11}$ | <b>Age</b>                              | 1.37         | 1.07                                 | 1.75 | 0.013                 |
| <b>Female Sex</b>                     | 0.91         | 0.65                                 | 1.27 | 0.579                  | <b>Female Sex</b>                       | 0.97         | 0.65                                 | 1.45 | 0.893                 |
| <b>Urine Albumin:creatinine Ratio</b> | 1.39         | 1.21                                 | 1.61 | $6.68 \times 10^{-6}$  | <b>Coronary Artery Calcified Plaque</b> | 1.83         | 1.39                                 | 2.40 | $1.73 \times 10^{-5}$ |
| <b>Insulin Use</b>                    | 1.65         | 1.17                                 | 2.34 | 0.005                  | <b>Urine Albumin:creatinine Ratio</b>   | 1.51         | 1.26                                 | 1.81 | $1.05 \times 10^{-5}$ |
| <b>Waist Hip Ratio</b>                | 1.22         | 1.00                                 | 1.49 | 0.054                  | <b>Diabetes Duration</b>                | 1.25         | 1.02                                 | 1.53 | 0.033                 |
|                                       |              |                                      |      |                        | <b>Current Smoking</b>                  | 1.67         | 1.07                                 | 2.60 | 0.024                 |
|                                       |              |                                      |      |                        | <b>Educational Attainment</b>           | 0.61         | 0.48                                 | 0.78 | $1.01 \times 10^{-4}$ |
